# Supplementary material for: Gene regulation gravitates toward either addition or multiplication when combining the effects of two signals
Source: eLife journal article supplement (doi:10.7554/elife.59388), 2020-12-07
Supplement: supp [file elife-59388-supp-v1.zip]

Archive with 9 entries (9 files):
- elife_poa_e59388_Transparent_Reporting_File.docx
- elife_poa_e59388_Figure_1_figure_supplement_1.pdf
- elife_poa_e59388_Figure_1_figure_supplement_2.pdf
- elife_poa_e59388_Figure_1_figure_supplement_3.pdf
- elife_poa_e59388_Figure_1_figure_supplement_4.pdf
- elife_poa_e59388_Figure_1_figure_supplement_5.pdf
- elife_poa_e59388_Figure_2_figure_supplement_1.pdf
- elife_poa_e59388_Figure_4_figure_supplement_1.pdf
- elife_poa_e59388_Supplementary_file_1.docx
