# Supplementary figures and images for: Gene regulation gravitates toward either addition or multiplication when combining the effects of two signals
Source: eLife journal article supplement (doi:10.7554/elife.59388), 2020-12-07

Figure 2 — figure supplement 1

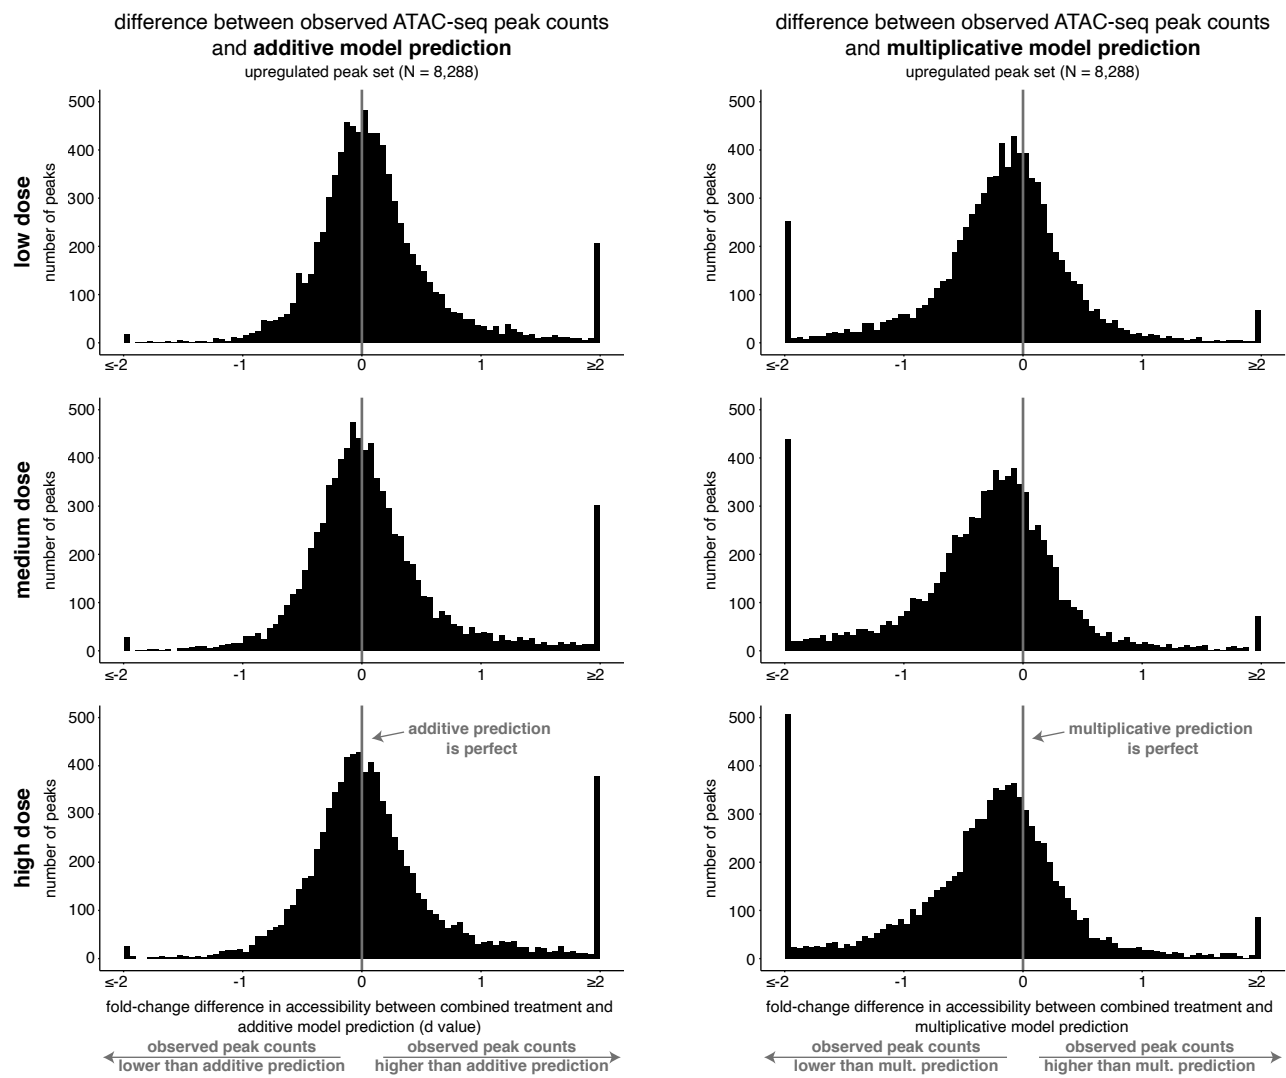

Supplement: supp [file elife-59388-supp-v1.zip]

Figure 1 — figure supplement 1

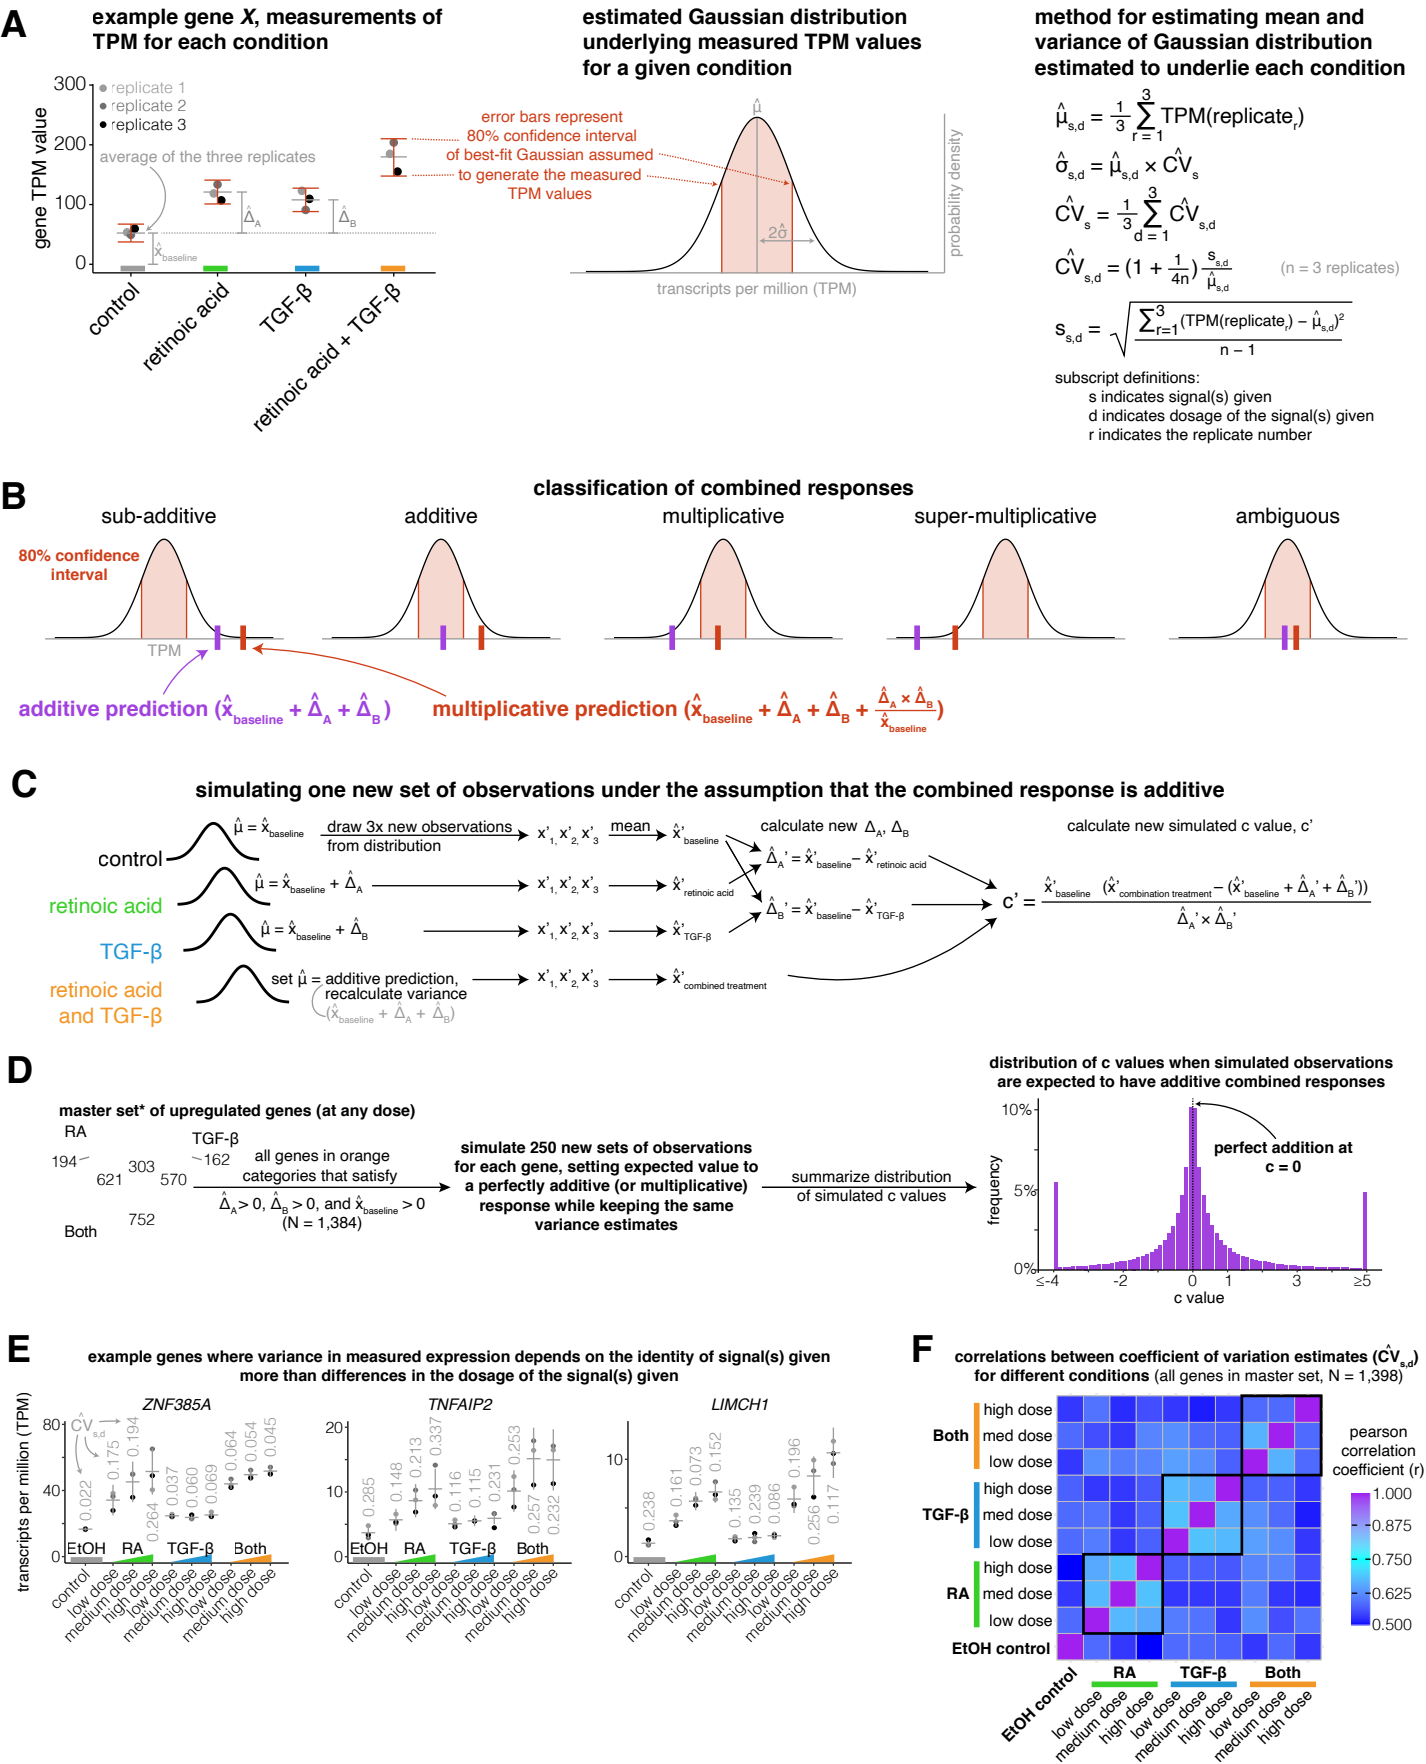

Supplement: supp [file elife-59388-supp-v1.zip]

# Figure 1 — figure supplement 4

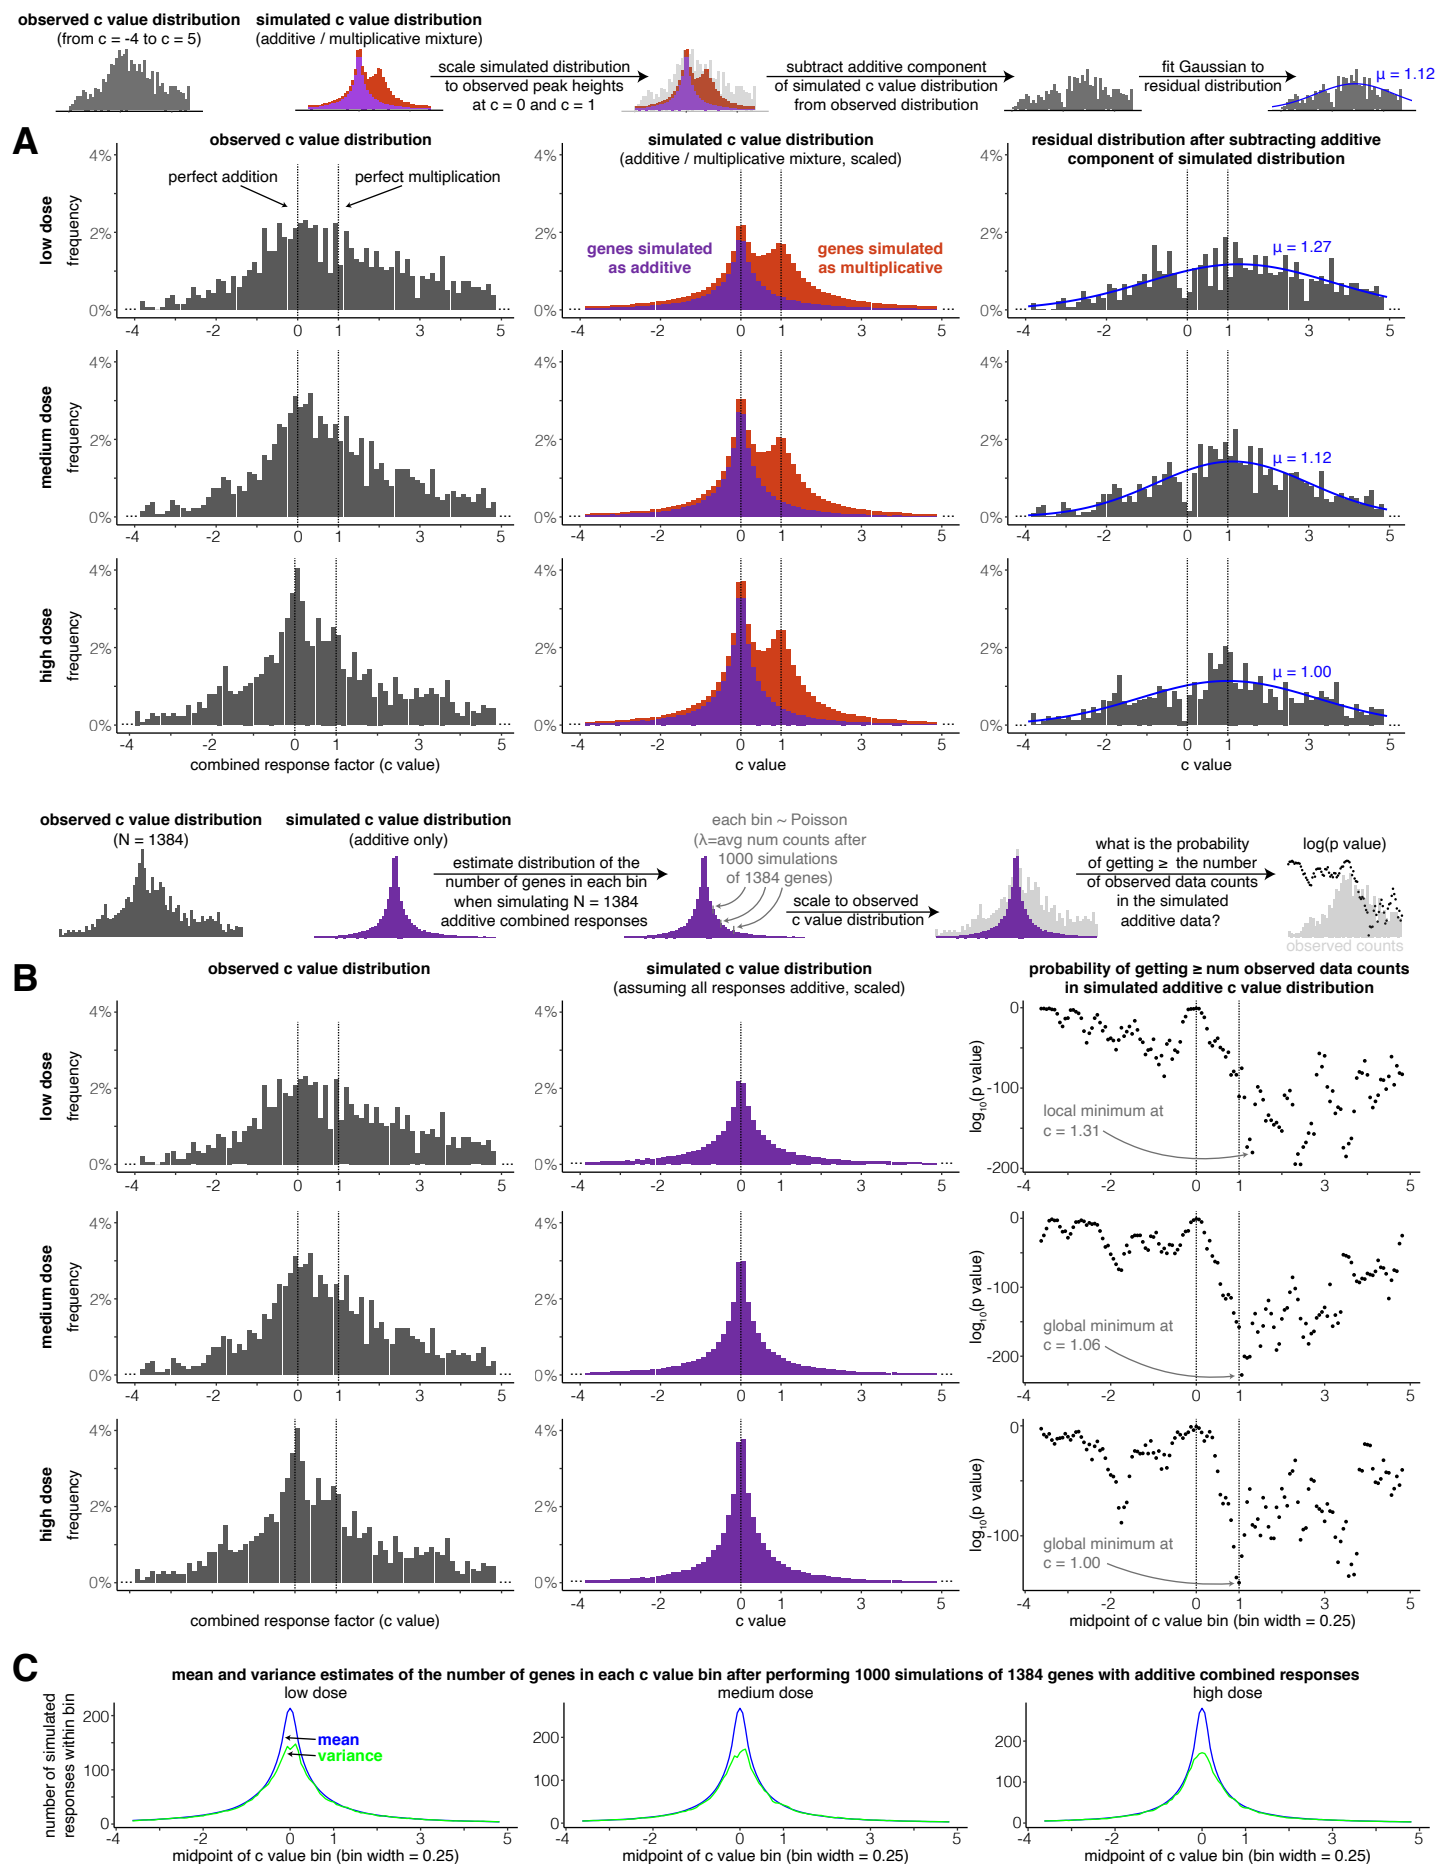

Supplement: supp [file elife-59388-supp-v1.zip]

Figure 1 — figure supplement 5

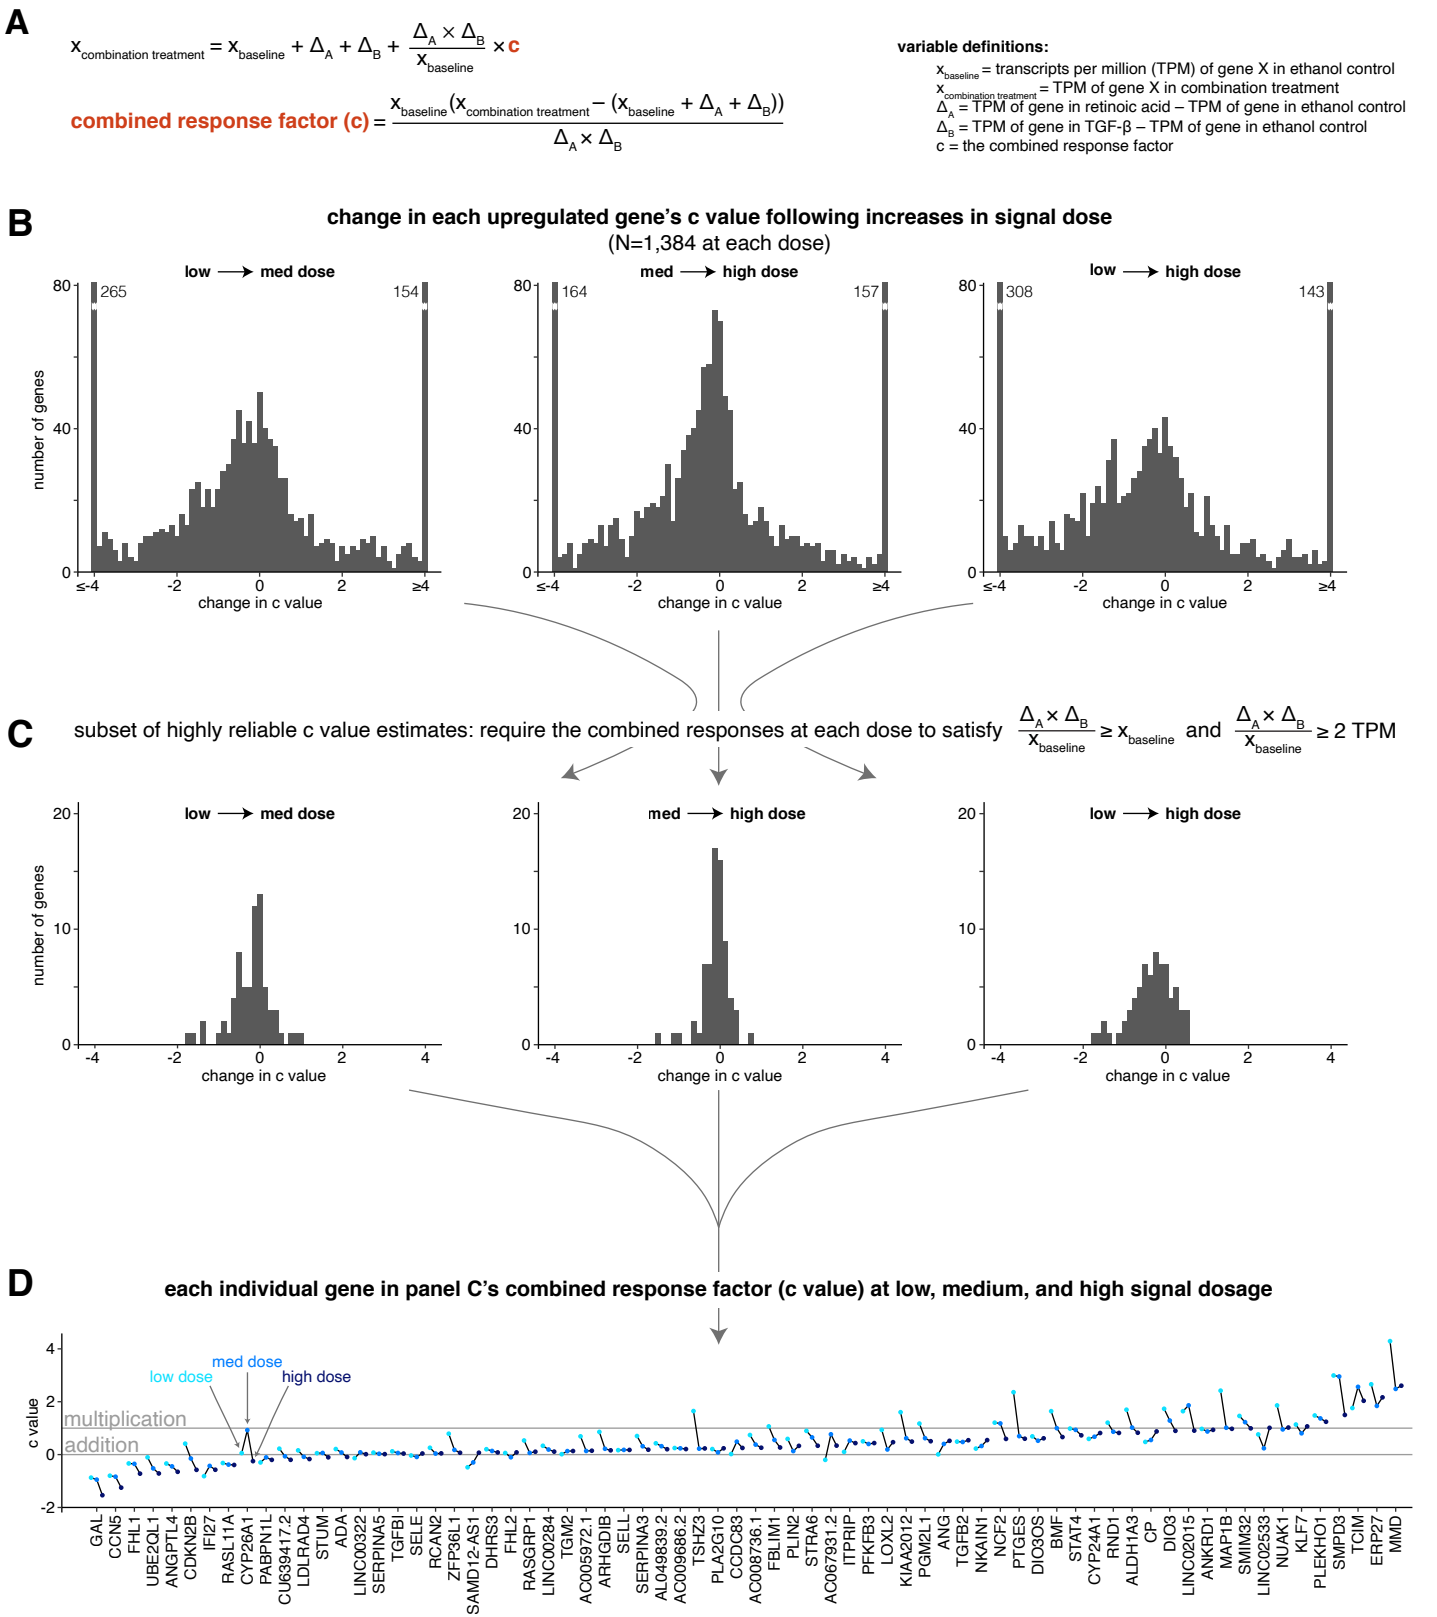

Supplement: supp [file elife-59388-supp-v1.zip]

**Figure 1 — figure supplement 2**

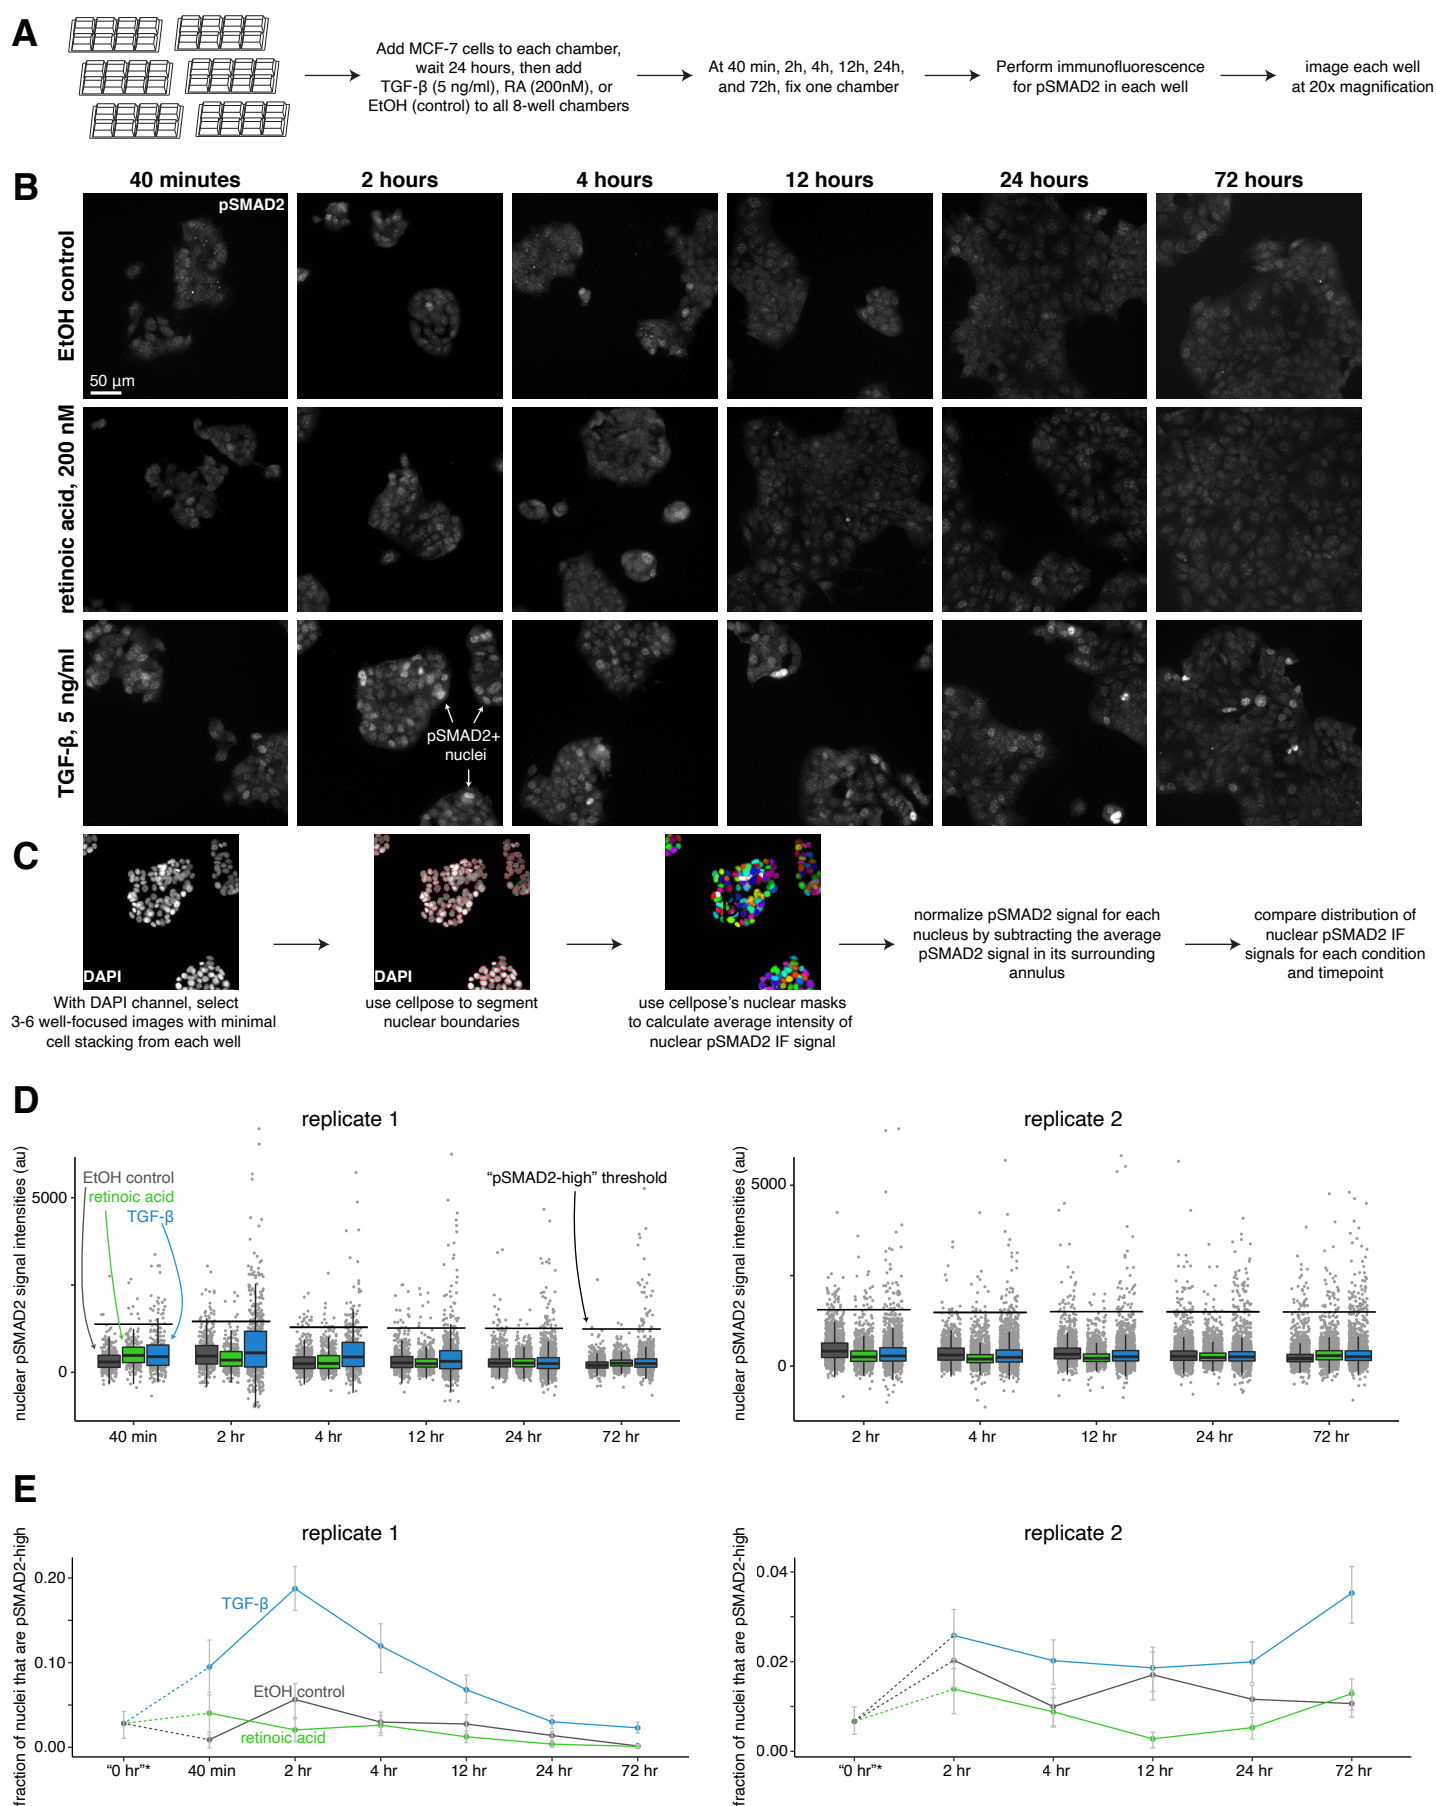

Supplement: supp [file elife-59388-supp-v1.zip]

Figure 1 — figure supplement 3

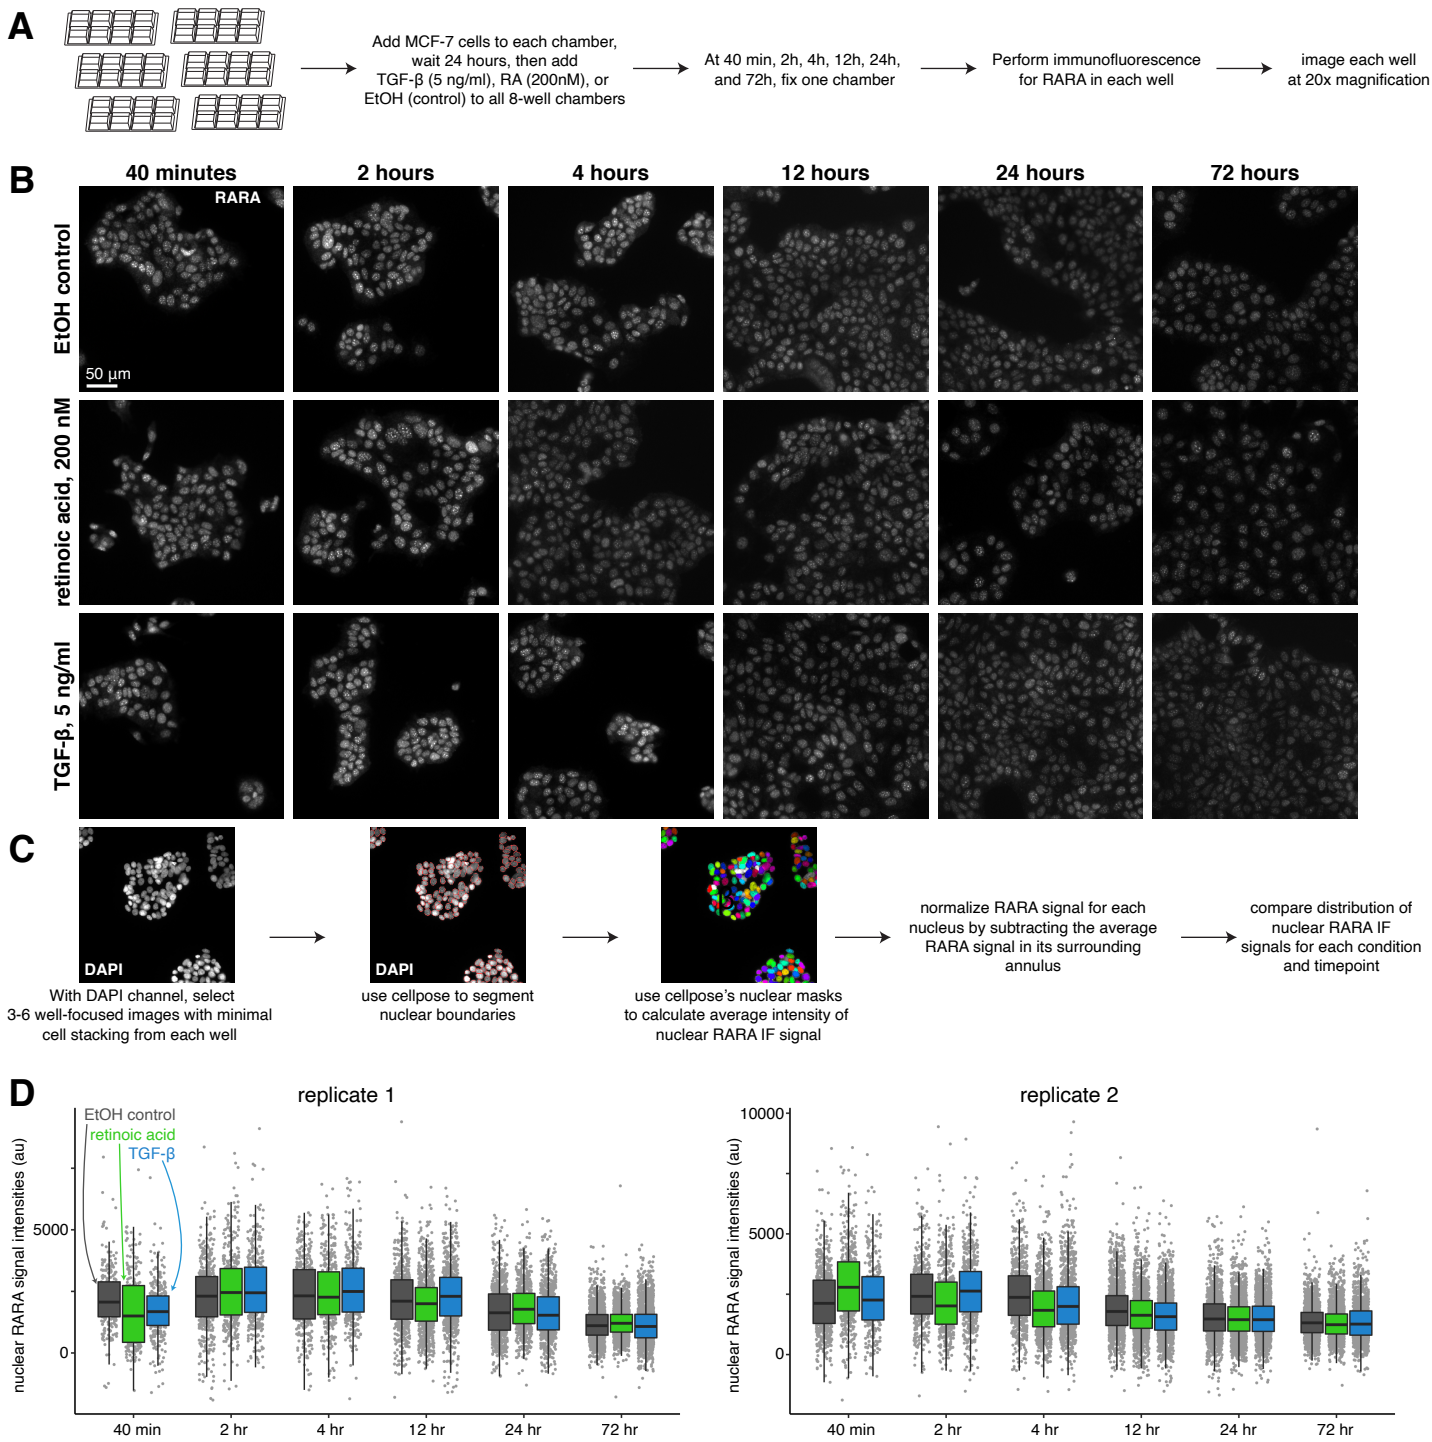

Supplement: supp [file elife-59388-supp-v1.zip]

Figure 4 — figure supplement 1

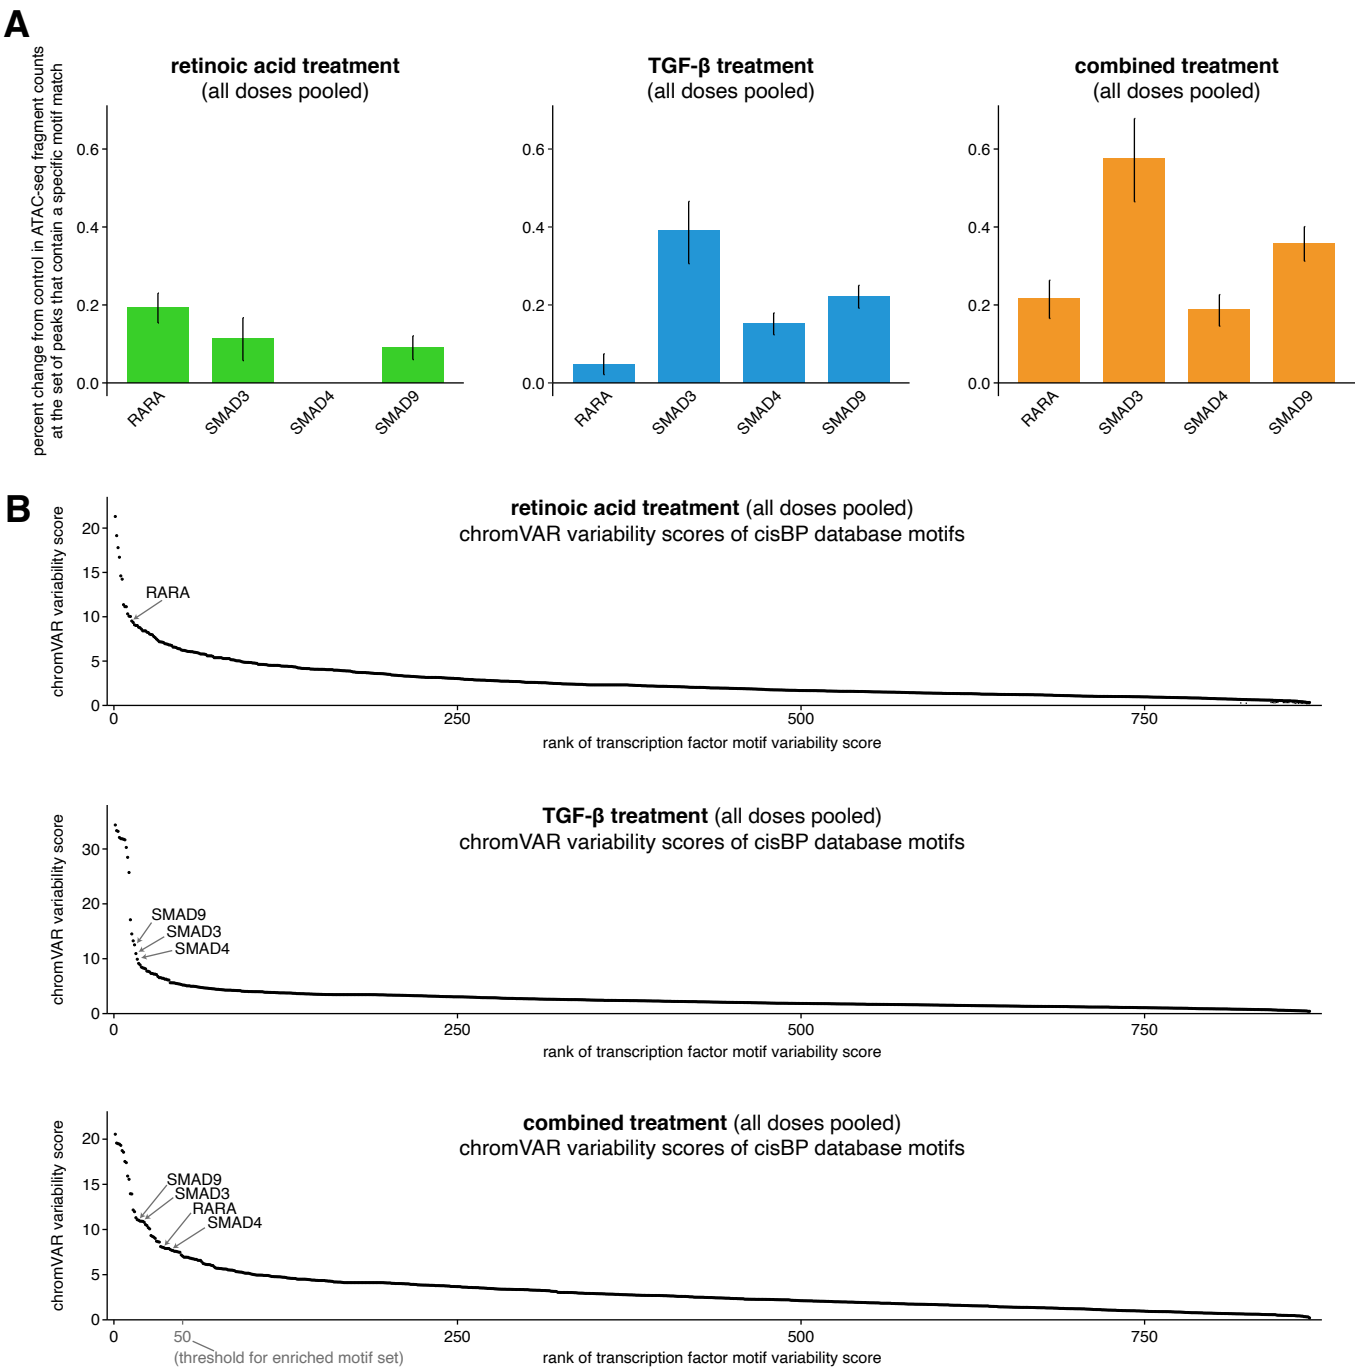

Supplement: supp [file elife-59388-supp-v1.zip › elife_poa_e59388_Figure_4_figure_supplement_1.pdf]
